# Supplementary material for: 1972(昭和47)年度広島大学泌尿器科患者の統計的観察
Source: Royal Society of Chemistry journal article supplement (doi:10.1039/c4dt01620c), 1974-02-01
Supplement: c4dt01620c1.pdf [file c4dt01620c1.pdf]

# Crystal Structure and Magnetic Properties of a Zintl Phase $\text{EuIrIn}_4$ : The First Member in the Eu-Ir-In Family

Sumanta Sarkar,<sup>1</sup> Matthias J. Gutmann,<sup>2</sup> Sebastian C. Peter<sup>1\*</sup>

<sup>1</sup>New Chemistry Unit, Jawaharlal Nehru Centre for Advanced Scientific Research, Jakkur,  
Bangalore, 560064, India

<sup>2</sup>ISIS Facility, STFC-Rutherford Appleton Laboratory, Didcot, OX11 0QX, United Kingdom

## Supporting Information

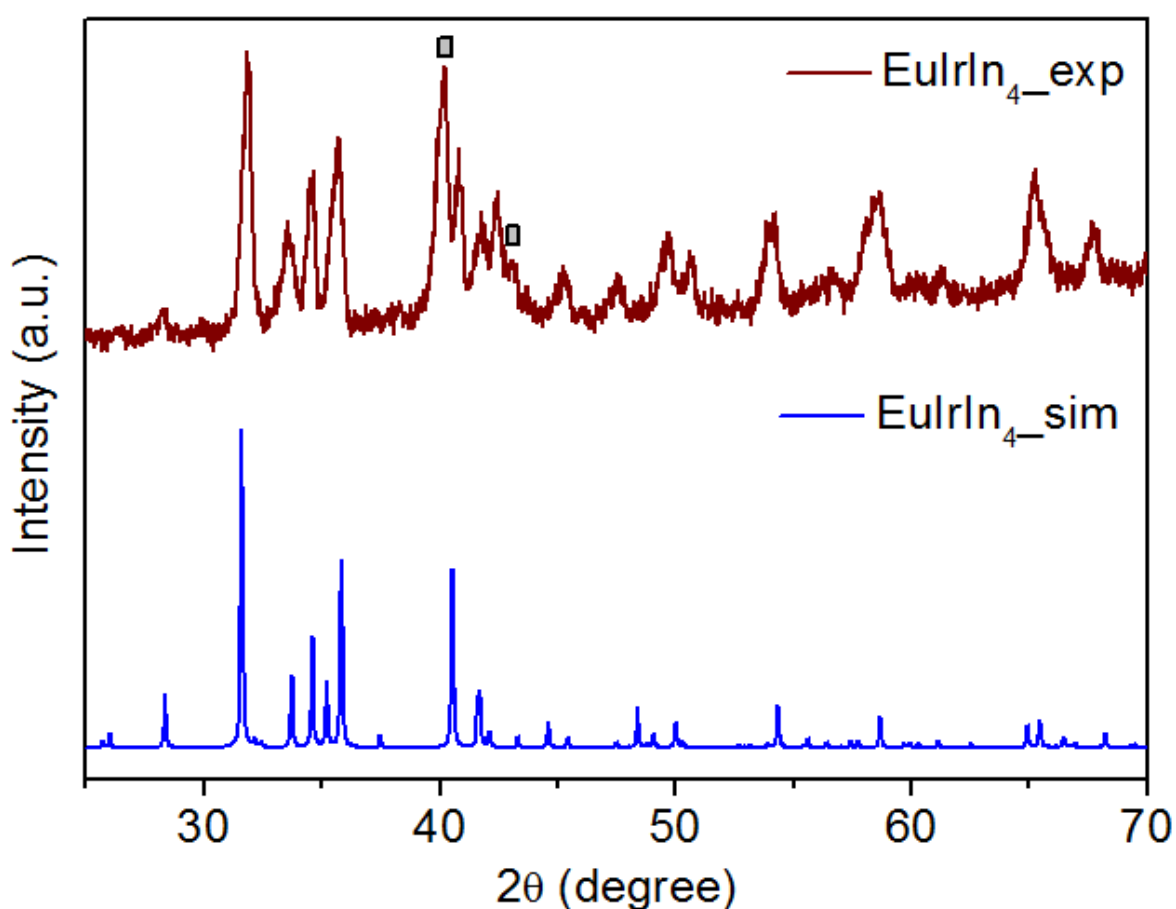

**Figure S1.** Comparison of PXRD patterns of  $\text{EuIrIn}_4$  sample crushed from single crystals and simulated pattern obtained from the single crystal structure refinement. The peaks have been marked with grey rectangles correspond to extraneous indium.
